# Supplementary material
Source: PubMed Central journal article supplement (PMC187893)

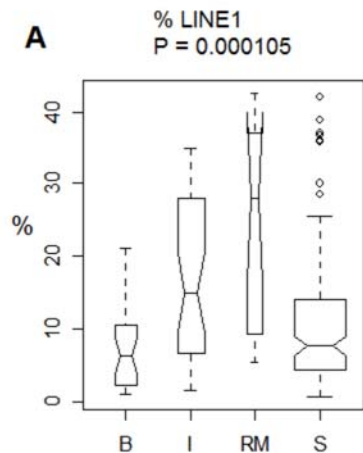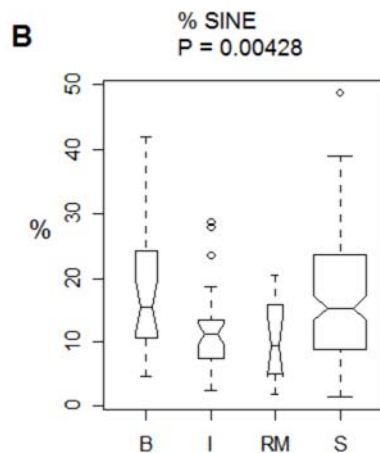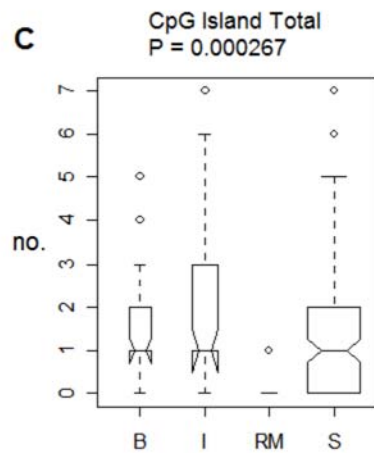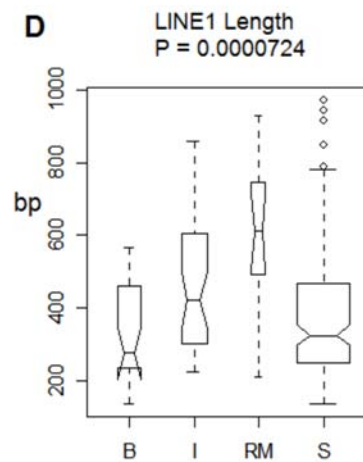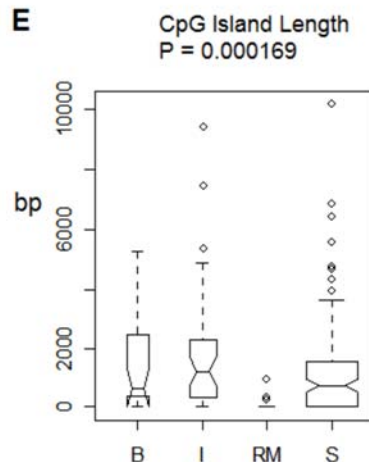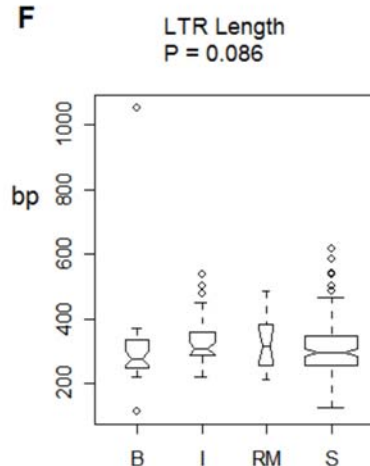

Supplement: pnas_100_17_9940__3.pdf [file pnas_100_17_9940__3.pdf]

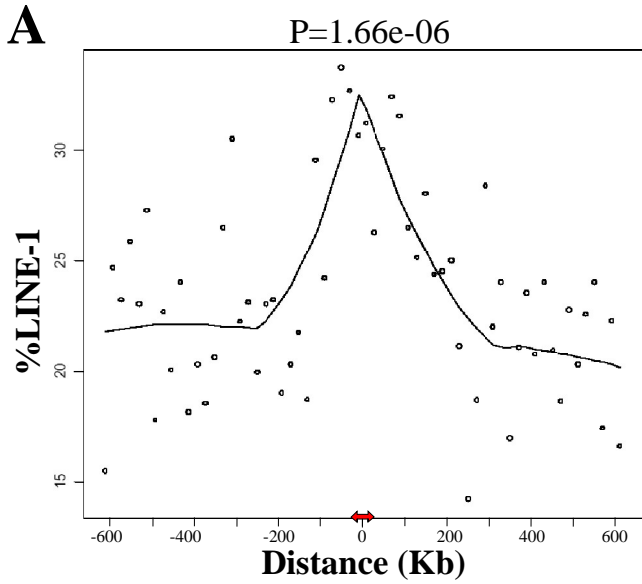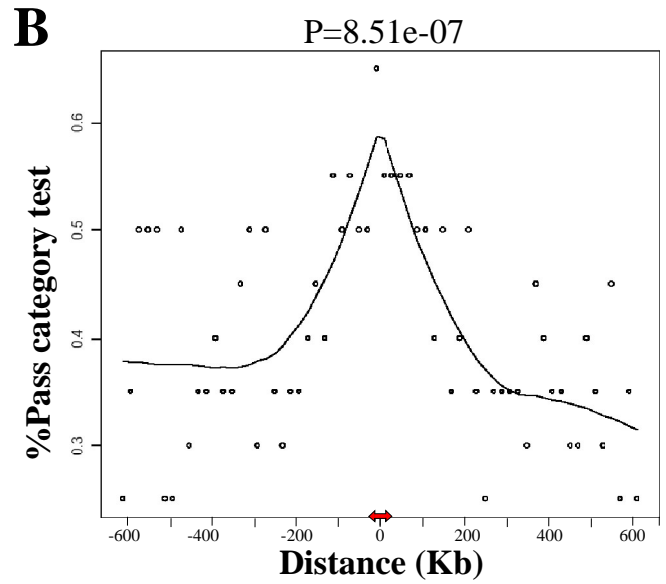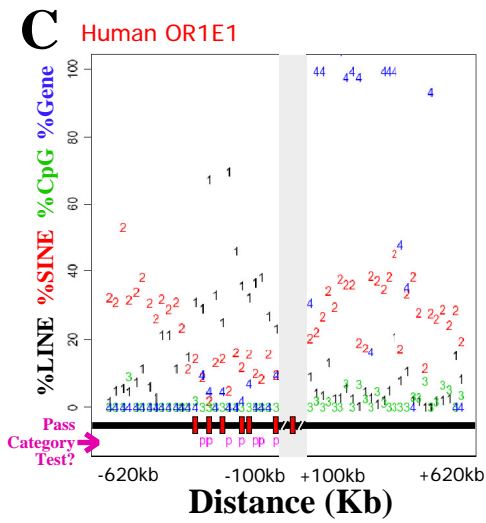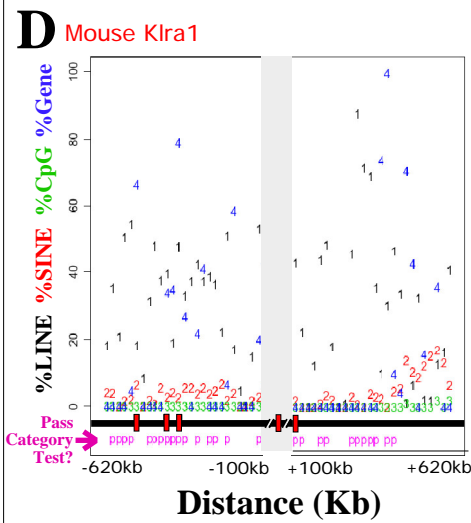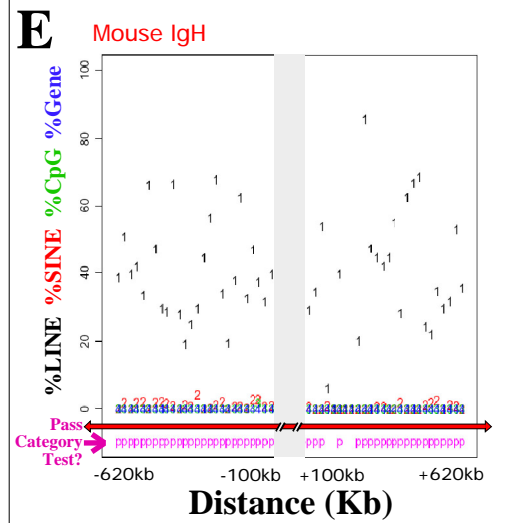

Supplement: pnas_100_17_9940__5.pdf [file pnas_100_17_9940__5.pdf]
